# Supplementary material for: Divergent Role for STAT5 in the Adaptive Responses of Natural Killer Cells
Source: PubMed Central journal article supplement — Cell Rep. Author manuscript; Available in PMC 2020 Dec 30. (PMC7773031; doi:10.1016/j.celrep.2020.108498), 2020-12-15
Supplement: NIHMS1657047-supplement-1.pdf [file NIHMS1657047-supplement-1.pdf]

**Cell Reports, Volume 33**

**Supplemental Information**

**Divergent Role for STAT5 in the Adaptive  
Responses of Natural Killer Cells**

**Gabriela M. Wiedemann, Simon Grassmann, Colleen M. Lau, Moritz Rapp, Alejandro V. Villarino, Christin Friedrich, Georg Gasteiger, John J. O'Shea, and Joseph C. Sun**

## Supplementary Material

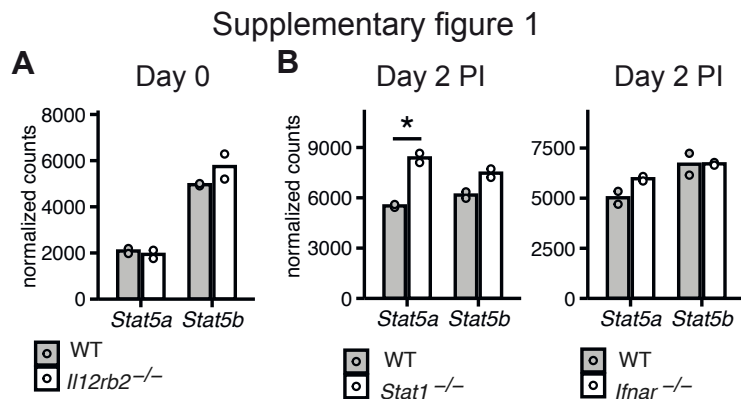

**Fig. S1. IL-12- and STAT4-dependent induction of STAT5 in NK cells during MCMV infection.** Related to Figure 1.

(A) RNA-seq on WT vs. *Il12rb2*<sup>-/-</sup> NK cells from mixed BMC on day 0 (uninfected). Normalized counts of *Stat5a* and *Stat5b* are displayed. (B) RNA-seq on WT vs. *Stat1*<sup>-/-</sup> or *Ifnar*<sup>-/-</sup> from mixed BMC on day 2 PI. Normalized counts of *Stat5a* and *Stat5b* are displayed.

## Supplementary figure 2

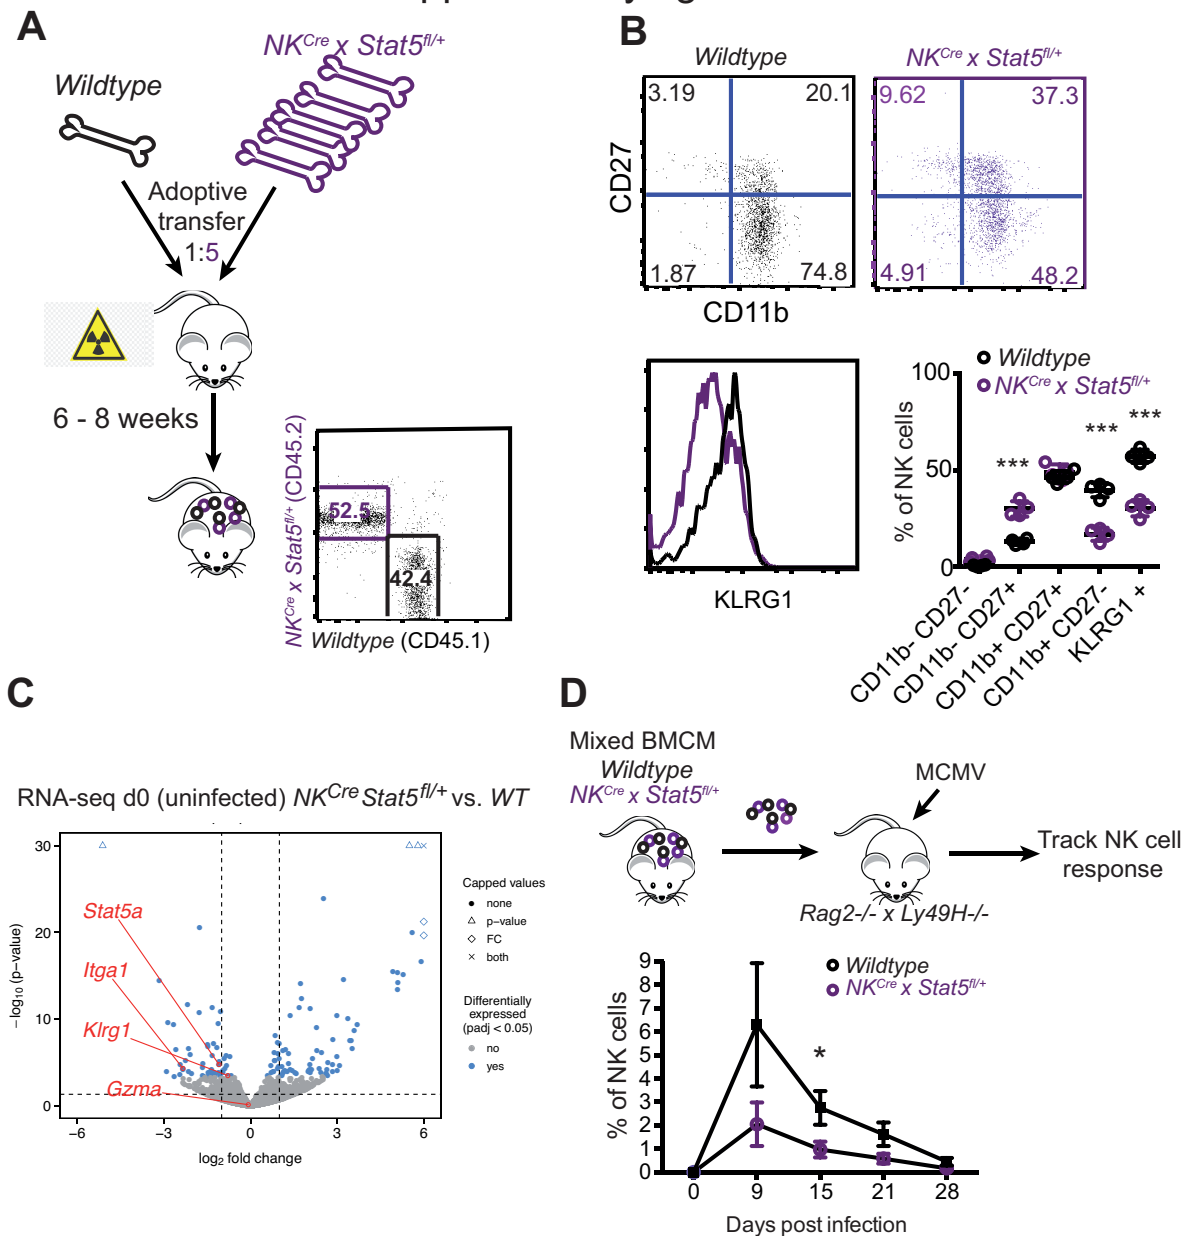

**Fig. S2. STAT5-dependent anti-viral NK cell response.** Related to figure 2.

(A-C). Mixed bone marrow chimeras (mBMC) were generated by lethal irradiation (900 cGy) of host mice, which were then reconstituted with a 1:5 mixture of bone marrow cells from WT and  $NK^{Cre} \times Stat5^{fl/+}$  donor mice. (A) Experimental schematic of mBMC generation. Representative flow blot of NK cell reconstitution 8 weeks after reconstitution. (B) Analysis of NK cell maturation markers on WT and  $NK^{Cre} \times Stat5^{fl/+}$  NK cells in mBMC 8 weeks post reconstitution. (Data is representative of at least 3 experiments). (C) Volcano blot of RNA-seq data on uninfected (d0) Ly49H<sup>+</sup> WT or  $NK^{Cre} \times Stat5^{fl/+}$  NK cells from mBMC. Blue dots show differentially expressed (FDR < 0.05) genes. Horizontal line indicates  $p = 0.05$ , and vertical lines show absolute  $\log_2$  fold change = 1. (D) Splenocytes from mixed WT :  $NK^{Cre} \times Stat5^{fl/+}$  BMC were adoptively transferred into  $Rag2^{-/-} \times Ly49H^{-/-}$  mice and infected with MCMV. Graph shows percentage of Ly49H<sup>+</sup> WT or KO NK cells of total NK cells over the course of infection. Data is representative of 2 independent experiments (n=3-4). All error bars indicate SEM.

### Supplementary figure 3

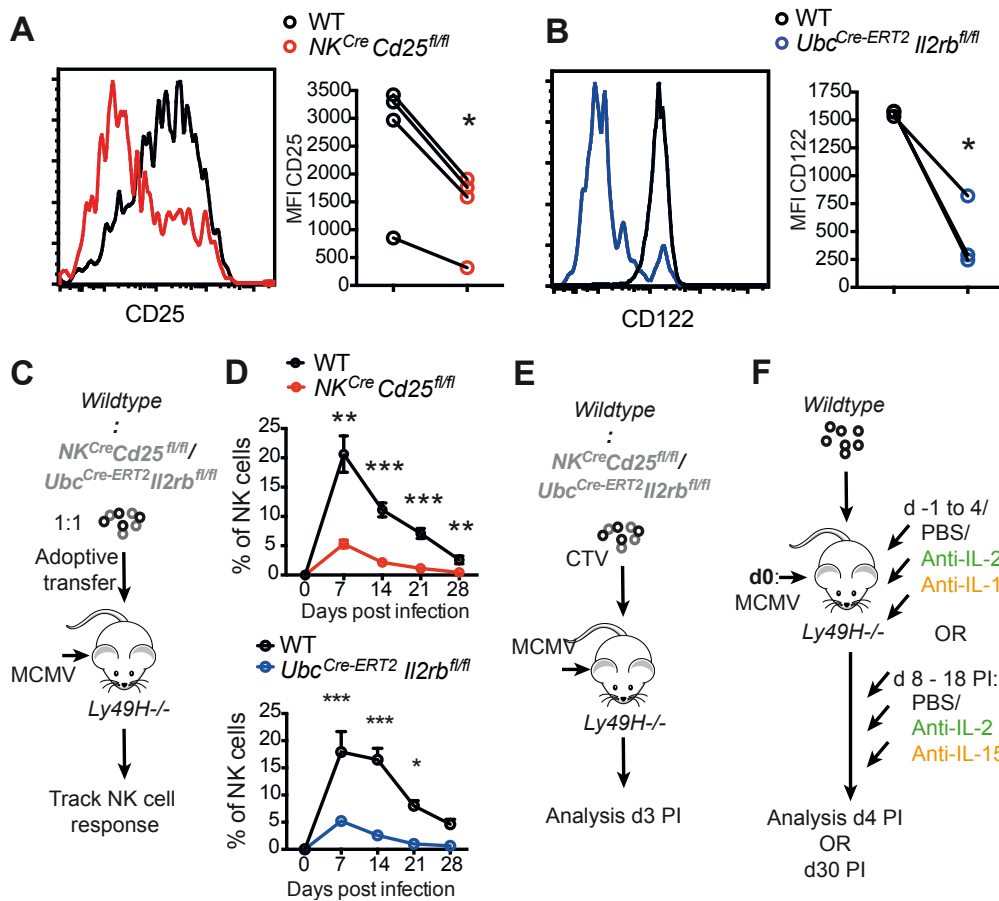

**Fig. S3. Both IL-2 and IL-15 drive NK cell expansion *in vivo*.** Related to figures 3 and 4. (A-C) Equal numbers of WT and  $Ubc^{Cre-ERT2} \times Il2rb^{fl/fl}$  or  $NK^{Cre} \times CD25^{fl/fl}$  NK cells were transferred into  $Ly49h^{-/-}$  mice. Mice transferred with  $Ubc^{Cre-ERT2} \times Il2rb^{fl/fl}$  NK cells were treated with tamoxifen on days -3, -2 and -1 before infection with MCMV. Following MCMV infection, relative percentages of  $Ly49H^{+}$  WT and KO NK cells are displayed (n = 4-5). (A) Analysis of CD25 expression on WT and  $NK^{Cre} \times CD25^{fl/fl}$  NK cells on day 3 PI. Data is representative of 2 independent experiments. (B) Analysis of CD122 expression on WT  $Ubc^{Cre-ERT2} \times Il2rb^{fl/fl}$  on day 3 PI. Data is representative of 2 independent experiments. (C) Experimental schematic of adoptive transfer and infection. (D) Graphs display percentage of  $Ly49H^{+}$  WT and  $NK^{Cre} \times CD25^{fl/fl}$  or  $Ubc^{Cre-ERT2} \times Il2rb^{fl/fl}$  NK cells of total NK cells over the course of infection. Data is representative of at least 2 independent experiments (n=4-5). (E). Experimental schematic of CTV labeling and analysis: NK cells from WT mice,  $NK^{Cre} \times CD25^{fl/fl}$  mice, or  $Ubc^{Cre-ERT2} \times Il2rb^{fl/fl}$  mice treated with tamoxifen on days -3, -2 and -1 were labeled with CTV and transferred into  $Ly49h^{-/-}$  mice, followed by infection with MCMV. (F) Experimental schematic of antibody-mediated IL-2 and IL-15 depletion: WT  $Ly49H^{+}$  NK cells were transferred into  $Ly49h^{-/-}$  mice treated with PBS, anti-IL-2, or anti-IL-15 on day -1 to 4 PI (early) or days 8 to 18 PI (late) and analyzed on day 4 PI (early) or day 30 PI (late). All error bars indicate SEM.
